# Supplementary material for: Sn-stabilized Li-rich layered Li(Li0.17Ni0.25Mn0.58)O2 oxide as a cathode for advanced lithium-ion batteries
Source: Royal Society of Chemistry journal article supplement (doi:10.1039/c5ta03415a), 2015-01-01
Supplement: c5ta03415a1.pdf [file c5ta03415a1.pdf]

## Sn-stabilized Li-rich layered $\text{Li}(\text{Li}_{0.17}\text{Ni}_{0.25}\text{Mn}_{0.58})\text{O}_2$ oxide as cathode for advanced lithium-ion batteries

Qi-Qi Qiao, Lei Qin, Guo-Ran Li, Yong-Long Wang and Xue-Ping Gao\*

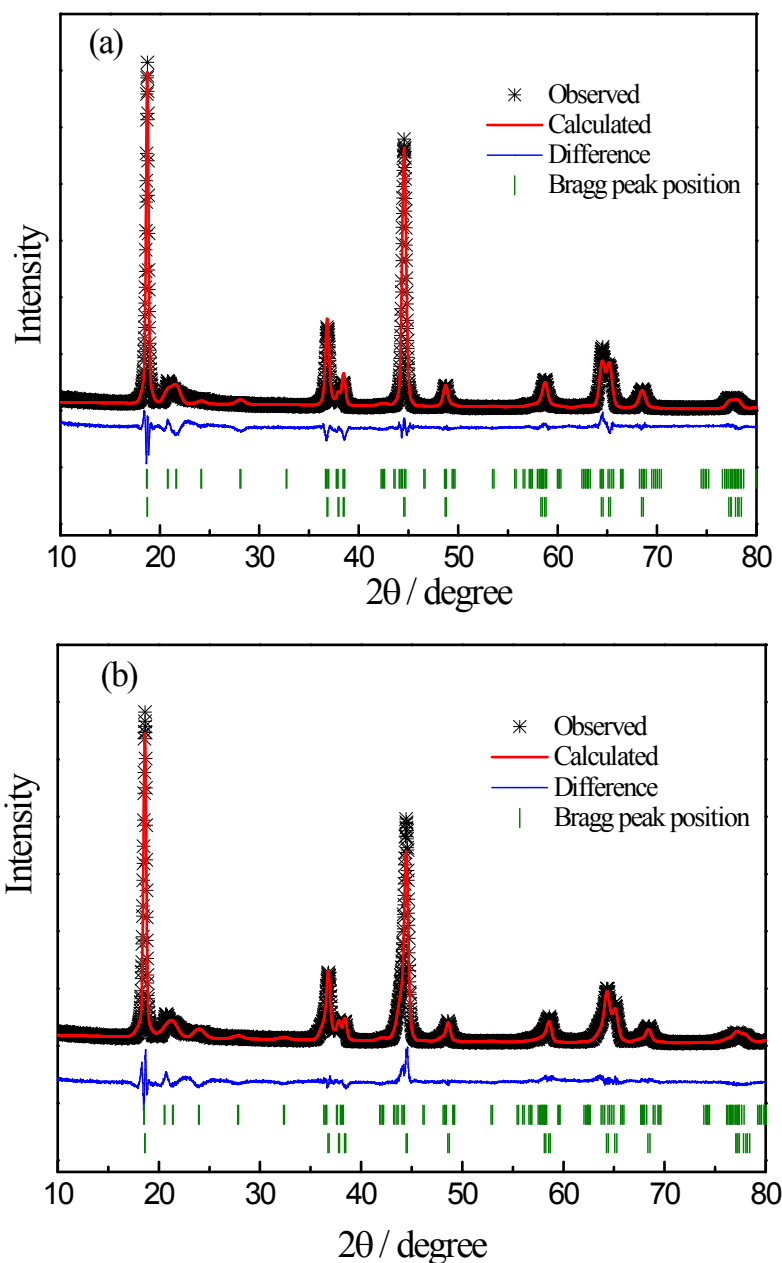

**Fig. S1.** Reitveld refinements of the pristine LNMO (a) and LNMO-Sn<sub>0.01</sub> (b) based on the  $\text{LiNi}_{0.5}\text{Mn}_{0.5}\text{O}_2$  ( $R\bar{3}m$ ) and  $\text{Li}_2\text{MnO}_3$  ( $C2/m$ ) structure.  $\text{Li}_{1.17}\text{Ni}_{0.25}\text{Mn}_{0.58}\text{O}_2$  is considered as  $0.4\text{Li}_2\text{MnO}_3 \cdot 0.6\text{LiNi}_{0.5}\text{Mn}_{0.5}\text{O}_2$ , while  $\text{Li}_{1.17}\text{Ni}_{0.25}\text{Mn}_{0.57}\text{Sn}_{0.01}\text{O}_2$  is considered as  $0.4\text{Li}_2\text{Mn}_{0.98}\text{Sn}_{0.02}\text{O}_3 \cdot 0.6\text{LiNi}_{0.5}\text{Mn}_{0.49}\text{Sn}_{0.01}\text{O}_2$ . Here, the occupancy of Sn site is set to replace Mn site to refine.

**Table S1.** The atom parameters for  $\text{LiNi}_{0.5}\text{Mn}_{0.5}\text{O}_2$  phase in LNMO and LNMO-Sn<sub>0.01</sub> materials. sg = space group, occ = site occupancy.

| sg: $R\bar{3}m$ | LNMO |   |           |          | LNMO-Sn <sub>0.01</sub> |   |          |          |
|-----------------|------|---|-----------|----------|-------------------------|---|----------|----------|
|                 | x    | y | z         | occ      | x                       | y | z        | occ      |
| Li (3a)         | 0    | 0 | 0         | 0.913(6) | 0                       | 0 | 0        | 0.928(6) |
| Li (3b)         | 0    | 0 | 0.5       | 0.086(4) | 0                       | 0 | 0.5      | 0.071(4) |
| Ni (3a)         | 0    | 0 | 0         | 0.086(4) | 0                       | 0 | 0        | 0.071(4) |
| Ni (3b)         | 0    | 0 | 0.5       | 0.414(4) | 0                       | 0 | 0.5      | 0.429(4) |
| Mn (3b)         | 0    | 0 | 0.5       | 0.5000   | 0                       | 0 | 0.5      | 0.49000  |
| Sn (3b)         |      |   |           |          | 0                       | 0 | 0.5      | 0.01     |
| O (6c)          | 0    | 0 | 0.2437(7) | 1        | 0                       | 0 | 0.241407 | 1        |

**Table S2.** The atom parameters for  $\text{Li}_2\text{MnO}_3$  phase in LNMO and LNMO-Sn<sub>0.01</sub> materials. sg = space group, occ = site occupancy.

| sg: C2/m | LNMO       |           |            |     | LNMO-Sn <sub>0.01</sub> |           |            |      |
|----------|------------|-----------|------------|-----|-------------------------|-----------|------------|------|
|          | x          | y         | z          | occ | x                       | y         | z          | occ  |
| Li (2b)  | 0          | 0.5       | 0          | 1   | 0                       | 0.5       | 0          | 1    |
| Li (2c)  | 0          | 0         | 0.5        | 1   | 0                       | 0         | 0.5        | 1    |
| Li (4h)  | 0          | 0.6606    | 0.5        | 1   | 0                       | 0.6606    | 0.5        | 1    |
| Mn (4g)  | 0          | 0.1668(6) | 0          | 1   | 0                       | 0.1667(8) | 0          | 0.98 |
| Sn (4g)  |            |           |            |     | 0                       | 0.1667(8) | 0          | 0.02 |
| O (4i)   | 0.2098(17) | 0         | 0.2412(23) | 1   | 0.2722(18)              | 0         | 0.2262(21) | 1    |
| O (8j)   | 0.2160(19) | 0.3425(8) | 0.2379(27) | 1   | 0.2853(20)              | 0.3346(9) | 0.2654(20) | 1    |

**Table S3.** Summary of the *R* factors and the crystallographic parameters for LNMO and LNMO-Sn<sub>0.01</sub> materials

|                                                      | Rwp (%) | Rp (%) | Cell parameters (Å) |             |             | Ni in Li layer (%) |
|------------------------------------------------------|---------|--------|---------------------|-------------|-------------|--------------------|
|                                                      |         |        | a                   | b           | c           |                    |
| LNMO                                                 | 12.7    | 11.2   | 2.86221(22)         | 2.86221(22) | 14.2387(23) | 8.6                |
| $\text{Li}_2\text{MnO}_3$ in LNMO                    |         |        | 4.9573(15)          | 8.598(4)    | 5.0262(24)  |                    |
| LNMO-Sn <sub>0.01</sub>                              | 12.6    | 10.9   | 2.86179(23)         |             | 14.2642(25) | 7.1                |
| $\text{Li}_2\text{MnO}_3$ in LNMO-Sn <sub>0.01</sub> |         |        | 5.0042(35)          | 8.633(5)    | 5.0631(30)  |                    |

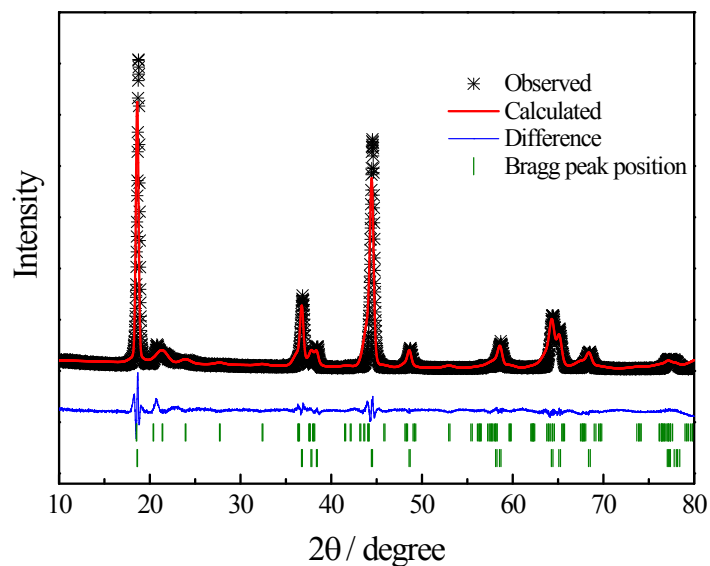

**Fig. S2.** Reitveld refinements of the pristine LNMO (a) and LNMO-Sn<sub>0.01</sub> (b) based on the LiNi<sub>0.5</sub>Mn<sub>0.5</sub>O<sub>2</sub> ( $R\bar{3}m$ ) and Li<sub>2</sub>MnO<sub>3</sub> (C2/m) structure. Here, the occupancies of Sn and Mn free to refine.

**Table S4.** The atom parameters for LiNi<sub>0.5</sub>Mn<sub>0.5</sub>O<sub>2</sub> phase in LNMO-Sn<sub>0.01</sub> material. sg = space group, occ = site occupancy.

| sg: $R\bar{3}m$ | LNMO-Sn <sub>0.01</sub> |   |          |            |
|-----------------|-------------------------|---|----------|------------|
|                 | x                       | y | z        | occ        |
| Li (3a)         | 0                       | 0 | 0        | 0.969(6)   |
| Li (3b)         | 0                       | 0 | 0.5      | 0.031(6)   |
| Ni (3a)         | 0                       | 0 | 0        | 0.031(6)   |
| Ni (3b)         | 0                       | 0 | 0.5      | 0.469(6)   |
| Mn (3b)         | 0                       | 0 | 0.5      | 0.649(13)  |
| Sn (3b)         | 0                       | 0 | 0.5      | -0.149(13) |
| O (6c)          | 0                       | 0 | 0.241407 | 1          |

**Table S5.** The atom parameters for Li<sub>2</sub>MnO<sub>3</sub> phase in LNMO-Sn<sub>0.01</sub> material. sg = space group, occ = site occupancy.

| sg: C2/m | LNMO-Sn <sub>0.01</sub> |            |            |           |
|----------|-------------------------|------------|------------|-----------|
|          | x                       | y          | z          | occ       |
| Li (2b)  | 0                       | 0.5        | 0          | 1         |
| Li (2c)  | 0                       | 0          | 0.5        | 1         |
| Li (4h)  | 0                       | 0.6606     | 0.5        | 1         |
| Mn (4g)  | 0                       | 0.1585(10) | 0          | 1.492(9)  |
| Sn (4g)  | 0                       | 0.1585(10) | 0          | -0.492(9) |
| O (4i)   | 0.2347(21)              | 0          | 0.2503(25) | 1         |
| O (8j)   | 0.3095(22)              | 0.3277(11) | 0.2359(21) | 1         |

**Table S6.** Summary of the  $R$  factors and the crystallographic parameters for LNMO-Sn<sub>0.01</sub> material

|                                                             | Rwp (%) | Rp (%) | Cell parameters (Å) |          |             |
|-------------------------------------------------------------|---------|--------|---------------------|----------|-------------|
|                                                             |         |        | a                   | b        | c           |
| LNMO-Sn <sub>0.01</sub>                                     | 11.9    | 9.6    | 2.86171(25)         |          | 14.2615(29) |
| Li <sub>2</sub> MnO <sub>3</sub> in LNMO-Sn <sub>0.01</sub> |         |        | 4.9980(30)          | 8.689(5) | 5.0607(35)  |

As shown in **Table S1**, **S2**, and **S3**, the refinement is acceptable with a low Rp value. When the occupancies of Sn and Mn are free to replace in the refinement, it is not appropriate with the appearance of negative occupancy (**Fig. S2** and **Table S4**, **S5**). It means that the occupancy of Sn atoms on Mn positions in the layered structure is reasonable.

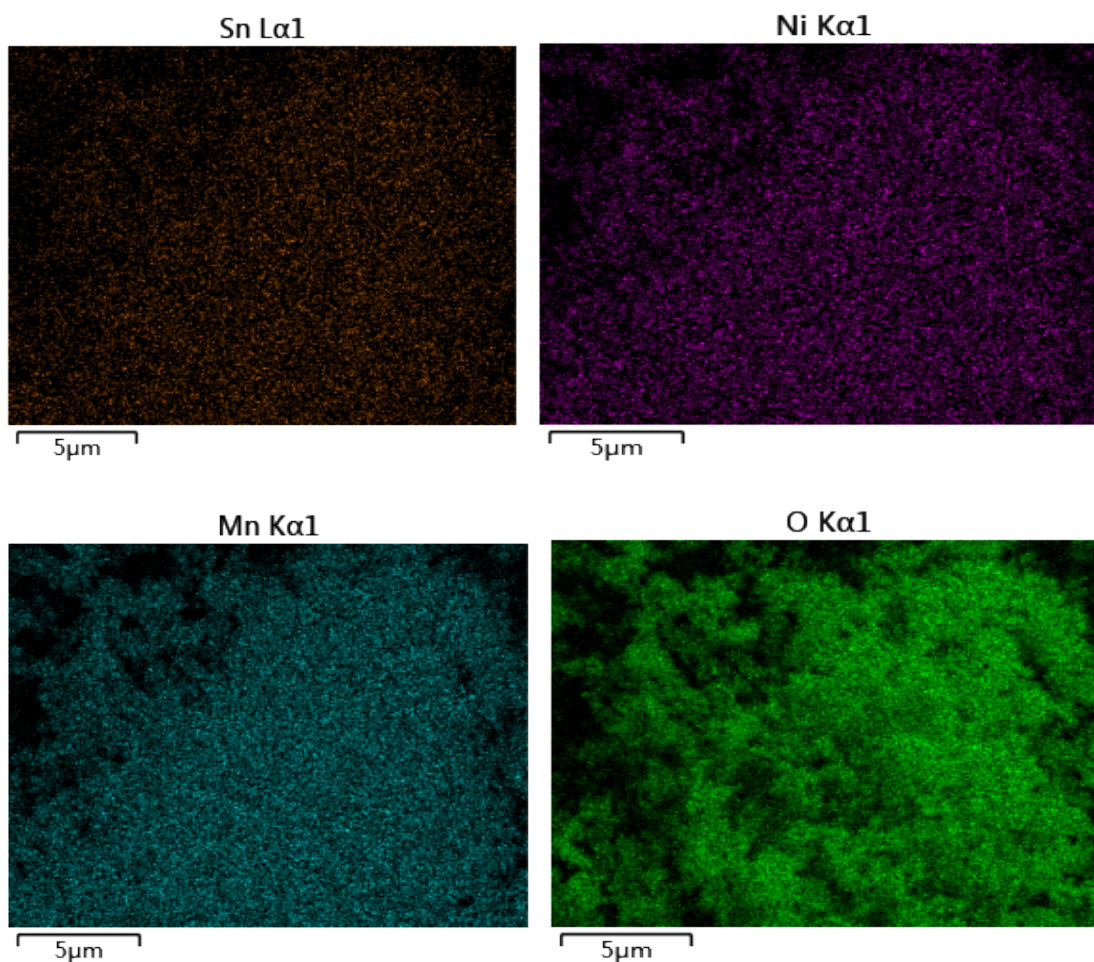

**Fig. S3.** The EDS mappings of Sn, Ni, Mn, and O in the LNMO-Sn<sub>0.03</sub> samples.

**Table S7.** Element concentration obtained by ICP-MS (wt%)

|                         | Li   | Ni   | Mn   | Sn   |
|-------------------------|------|------|------|------|
| LNMO                    | 9.72 | 15.9 | 32.6 |      |
| LNMO-Sn <sub>0.03</sub> | 9.08 | 15.9 | 29.8 | 2.26 |

**Table S8.** Atomic ratio based on ICP-MS

|                         | Li   | Ni   | Mn   | Sn   |
|-------------------------|------|------|------|------|
| LNMO                    | 1.21 | 0.24 | 0.51 |      |
| LNMO-Sn <sub>0.03</sub> | 1.16 | 0.24 | 0.48 | 0.02 |

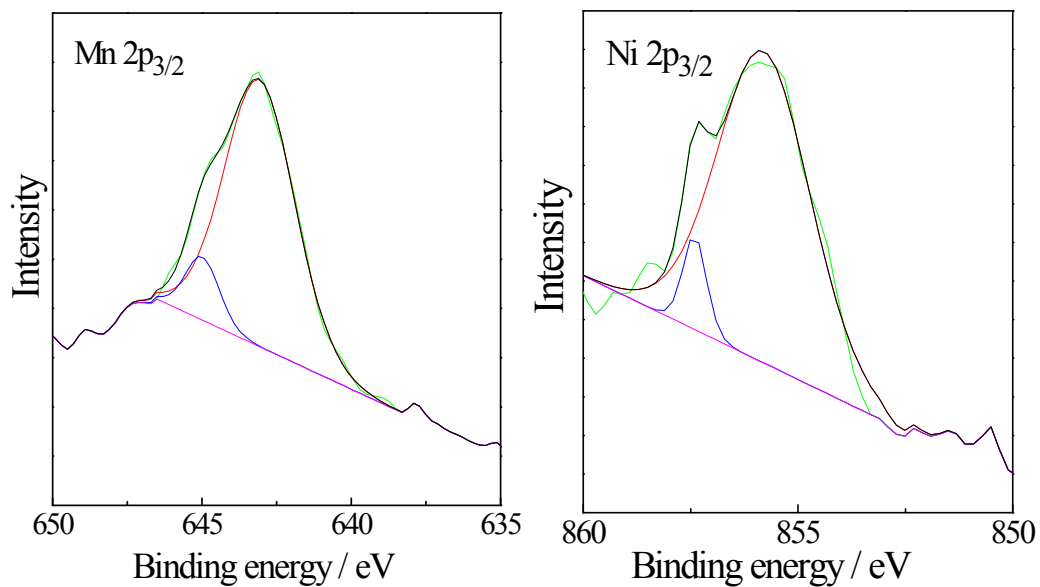

**Fig. S4.** XPS spectra and fitted curves of the LNMO-Sn<sub>0.03</sub> samples: Mn 2p and Ni 2p core levels.

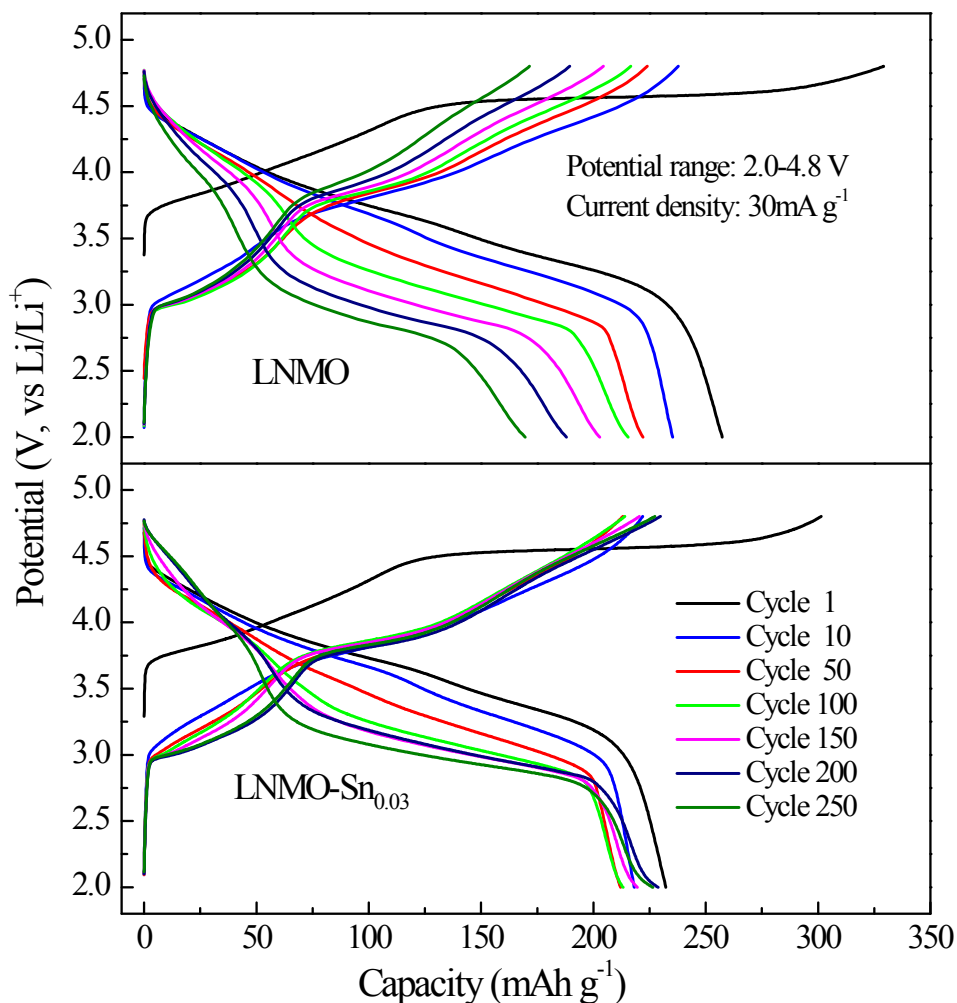

**Fig. S5.** The charge–discharge curves of the LNMO and LNMO-Sn<sub>0.03</sub> samples in different cycles at 0.1 C rate (30 mA g<sup>-1</sup>) between 2.0 and 4.8 V (vs Li/Li<sup>+</sup>)

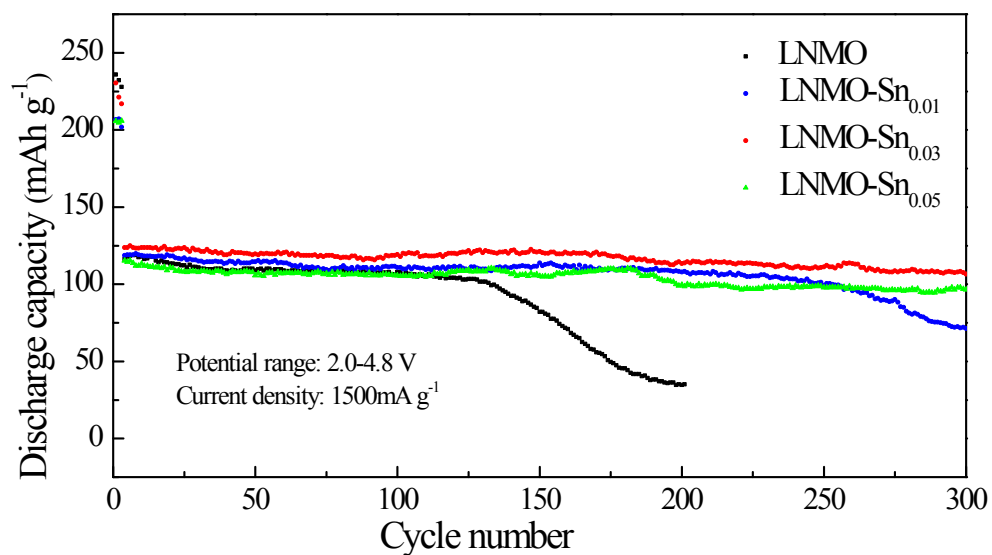

**Fig. S6.** Cycle performances of LNMO, LNMO-Sn<sub>0.01</sub>, LNMO-Sn<sub>0.03</sub>, and LNMO-Sn<sub>0.05</sub> samples at 5 C rate (1500 mA g<sup>-1</sup>)

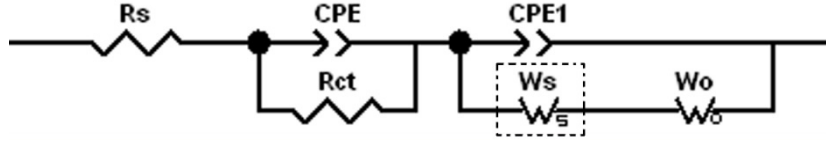

**Fig. S7.** Equivalent circuits used to fit the experimental data.  $R_s$  is solution resistance,  $R_{ct}$  is charge-transfer resistance, CPE and CPE1 are constant phase element,  $W_s$  and  $W_o$  are assigned to the finite Nernst diffusion impedance in the thin film and semi-infinite Warburg diffusion impedance in the bulk, respectively.

**Table S9.** The simulated results from electrochemical impedance spectra of the  $\text{Li}(\text{Li}_{0.17}\text{Ni}_{0.25}\text{Mn}_{0.58})\text{O}_2$  and  $\text{Sn}^{4+}$  substituted samples.

| Sample                                                                                  | Cycle | $R_{ct}$ ( $\Omega$ ) | $W_s$ ( $\Omega$ ) | $W_o$ ( $\Omega$ ) |
|-----------------------------------------------------------------------------------------|-------|-----------------------|--------------------|--------------------|
| $\text{Li}(\text{Li}_{0.17}\text{Ni}_{0.25}\text{Mn}_{0.58})\text{O}_2$                 | 1st   | 471.9                 | -                  | 411.3              |
|                                                                                         | 10th  | 38.1                  | -                  | 9013               |
|                                                                                         | 30th  | 43.6                  | -                  | 9508               |
|                                                                                         | 50th  | 43.9                  | 1029               | 2503               |
|                                                                                         | 100th | 44.6                  | 628                | 2862               |
| $\text{Li}(\text{Li}_{0.17}\text{Ni}_{0.25}\text{Mn}_{0.57}\text{Sn}_{0.01})\text{O}_2$ | 1st   | 359.1                 | 397.4              | 2991               |
|                                                                                         | 10th  | 72.3                  | 940.2              | 1316               |
|                                                                                         | 30th  | 68.8                  | 524.2              | 875                |
|                                                                                         | 50th  | 81.2                  | 1173               | 1145               |
|                                                                                         | 100th | 91.1                  | 791.9              | 1231               |
| $\text{Li}(\text{Li}_{0.17}\text{Ni}_{0.25}\text{Mn}_{0.55}\text{Sn}_{0.03})\text{O}_2$ | 1st   | 262.6                 | 398.6              | 951                |
|                                                                                         | 10th  | 56.2                  | 1334               | 1801               |
|                                                                                         | 30th  | 78.3                  | 1338               | 1809               |
|                                                                                         | 50th  | 97.7                  | 454.1              | 1258               |
|                                                                                         | 100th | 155.8                 | 1189               | 1352               |
| $\text{Li}(\text{Li}_{0.17}\text{Ni}_{0.25}\text{Mn}_{0.53}\text{Sn}_{0.05})\text{O}_2$ | 1st   | 188.0                 | 1768               | 1299               |
|                                                                                         | 10th  | 43.5                  | 639.1              | 523.8              |
|                                                                                         | 30th  | 33.4                  | 874.2              | 1388               |
|                                                                                         | 50th  | 30.8                  | 905.8              | 1887               |
|                                                                                         | 100th | 41.9                  | 962.5              | 1322               |
